# Supplementary material for: Comparative Genomic and Transcriptomic Analysis Suggests the Evolutionary Dynamic of GH3 Genes in Gramineae Crops
Source: Front Plant Sci. 2019 Oct 15;10:1297. doi: 10.3389/fpls.2019.01297 (PMC6803601; doi:10.3389/fpls.2019.01297)
Supplement: Table S5 — Tajima’s D and average expression values of Ors. (A) Tajima’s D of each Or was calculated by DnaSP 5.0 (Librado and Rozas, 2009). (B) Average expression values (average FPKM value = total FPKM value of all genes in Or/gene number in Or) of all rice Ors. (C) Average expression values (the same calculation method to Figure B) of all maize Ors. [file Table_5.xlsx]

## Sheet: Sheet1
		Tajima's D	Average expression values of rice GH3 genes	Average expression values of maize GH3 genes
	Or1	-0.9049	188.7	546.35
	Or2	-0.3	118.84	844
	Or3	-0.64098	23.49	148.04
	Or4	-	26.09	-
	Or5	-	12.22	-
